1  
2  
3  
4  
5  
6  
7  
8  
9  
10  
11  
12  
13  
14  
15  
16  
17  
18  
19  
20  
21  
22  
23  
24  
25  
26

**(p)ppGpp and CodY promote *Enterococcus faecalis* virulence in a murine model of catheter-associated urinary tract infection**

**Colomer-Winter C<sup>1 a</sup>, Flores-Mireles AL<sup>2,3 a,b</sup>, Kundra S<sup>1</sup>, Hultgren SJ<sup>2,3</sup>, Lemos JA<sup>1 #</sup>**

**<sup>1</sup> Department of Oral Biology, University of Florida College of Dentistry, Gainesville, FL**

**<sup>2</sup> Department of Molecular Microbiology, Washington University School of Medicine, St. Louis, MO**

**<sup>3</sup> Center for Women’s Infectious Disease Research, Washington University School of Medicine, St. Louis, MO**

**Running title:** (p)ppGpp and CodY promote enterococcal CAUTI

a. Contributed equally to the work.

b. Present address: Department of Biological Sciences, University of Notre Dame, Notre Dame, IN, USA.

# Correspondence:

Email: [jlemos@dental.ufl.edu](mailto:jlemos@dental.ufl.edu)

**Abstract word count:** 244

**Text word count:** 3,603

## 27 **Abstract**

28           In Firmicutes, the nutrient-sensing regulators (p)ppGpp, the effector molecule of the  
29 stringent response, and CodY work in tandem to maintain bacterial fitness during infection.  
30 Here, we tested (p)ppGpp and *codY* mutant strains of *Enterococcus faecalis* in a catheter-  
31 associated urinary tract infections (CAUTI) mouse model and used global transcriptional  
32 analysis to investigate the (p)ppGpp and CodY relationship. Absence of (p)ppGpp or single  
33 inactivation of *codY* led to lower bacterial loads in catheterized bladders, and diminished biofilm  
34 formation on fibrinogen-coated surfaces under *in vitro* and *in vivo* conditions. Single inactivation  
35 of the bifunctional (p)ppGpp synthetase/hydrolase *rel* did not affect virulence supporting  
36 previous evidence that association of (p)ppGpp with enterococcal virulence is not dependent on  
37 activation of the stringent response. Inactivation of *codY* in the (p)ppGpp<sup>0</sup> strain restored *E.*  
38 *faecalis* virulence in the CAUTI model as well as the ability to form biofilms *in vitro*.  
39 Transcriptome analysis revealed that inactivation of *codY* restores, for the most part, the  
40 dysregulated metabolism of (p)ppGpp<sup>0</sup> cells. While a clear linkage between (p)ppGpp and CodY  
41 with expression of virulence factors could not be established, targeted transcriptional analysis  
42 indicate that a possible association between (p)ppGpp and c-di-AMP signaling pathways in  
43 response to the conditions found in the bladder may plays a role in enterococcal CAUTI.  
44 Collectively, this study identifies the (p)ppGpp-CodY network as an important contributor to  
45 enterococcal virulence in catheterized mouse bladder and supports that basal (p)ppGpp pools  
46 and CodY promote virulence through maintenance of a balanced metabolism during adverse  
47 conditions.

48

## 49 **Importance**

50           Catheter-associated urinary tract infections (CAUTI) are one of the most frequent types  
51 of infection found in the hospital setting that can develop into serious and potentially fatal  
52 bloodstream infections. One of the infectious agents that frequently cause complicated CAUTI is

53 the bacterium *Enterococcus faecalis*, a leading cause of hospital-acquired infections that are  
54 often difficult to treat due to the exceptional multidrug resistance of some isolates.  
55 Understanding the mechanisms by which *E. faecalis* causes CAUTI will aid in the discovery of  
56 new druggable targets to treat these infections. In this study, we report the importance of two  
57 nutrient-sensing bacterial regulators, named (p)ppGpp and CodY, for the ability of *E. faecalis* to  
58 infect the catheterized bladder of mice.

59

## 60 **Introduction**

61 Catheter-associated urinary tract infections (CAUTI) are one of the most common  
62 hospital-acquired infections, accounting worldwide for about 40% of all nosocomial infections (1-  
63 3). In addition to substantially increasing hospitalization time and costs, CAUTI can lead to  
64 serious and potentially deadly secondary bloodstream infections (4). Complicated CAUTI is  
65 often the result of bacteria forming biofilms on indwelling urinary catheters, and enterococci  
66 (mainly *Enterococcus faecalis* and *E. faecium*) appear as the second leading cause of  
67 complicated CAUTI in many healthcare facilities (4-6). In addition, *E. faecalis* and *E. faecium*  
68 are major etiological agents of other life-threatening infections such as infective endocarditis,  
69 and an even more serious threat to public health due to their exceptional antibiotic resistance  
70 (7). The recent rise in enterococcal infections urges the development of new therapies, and  
71 understanding the mechanisms that promote *E. faecalis* CAUTI might uncover new druggable  
72 targets.

73 The pathogenic potential of *E. faecalis*, and of all enterococci in general, is tightly  
74 associated with their outstanding ability to survive an array of physical and chemical stresses,  
75 including common detergents and antiseptics, fluctuations in temperature, pH, humidity, and  
76 prolonged starvation (7). The regulatory second messengers ppGpp (guanosine  
77 tetraphosphate) and pppGpp (guanosine pentaphosphate), collectively known as (p)ppGpp,  
78 broadly promote bacterial stress tolerance and virulence (8, 9). In *E. faecalis*, (p)ppGpp has

79 been shown to promote virulence in invertebrate and vertebrate animal models, and to mediate  
80 expression of virulence-related traits such as growth in blood and serum, biofilm formation,  
81 intraphagocytic survival and antibiotic tolerance (10-17). Originally described as the mediator of  
82 the stringent response (SR) (8), (p)ppGpp has distinct effects on bacterial physiology; at low  
83 (basal) concentrations it fine-tunes bacterial metabolism to adjust cellular growth in response to  
84 mild environmental changes (18), whereas at high levels it activates the SR responsible for  
85 promoting cell survival by slowing down growth-associated pathways and activating stress  
86 survival pathways (8, 18).

87 Two enzymes, the bifunctional synthetase/hydrolase Rel and the small alarmone  
88 synthetase RelQ, are responsible for enterococcal (p)ppGpp turnover (10, 19). Despite both  
89  $\Delta rel$  and  $\Delta rel/\Delta relQ$  strains being unable to mount the SR (10, 13), there are fundamental  
90 differences in basal (p)ppGpp levels between these two strains. Specifically, while the double  
91 mutant, herein (p)ppGpp<sup>0</sup> strain, is completely unable to synthesize (p)ppGpp, basal (p)ppGpp  
92 pools are about 4-fold higher in the  $\Delta rel$  strain due to the constitutively and weak synthetase  
93 activity of RelQ (10, 14, 19). Accumulated evidence indicates that the metabolic control exerted  
94 by basal (p)ppGpp pools is more important during enterococcal infections than the semi-  
95 dormancy state characteristic of the SR (10, 13-17). This is exemplified by the distinct virulence  
96 phenotypes of  $\Delta rel$  and (p)ppGpp<sup>0</sup> strains, both unable to mount the SR. Specifically, while only  
97 the (p)ppGpp<sup>0</sup> strain displayed attenuated virulence in *Caenorhabditis elegans* (10), *Galleria*  
98 *mellonella* (11, 13, 16) and in a rabbit abscess model (15), the  $\Delta rel$  single mutant strain showed  
99 attenuated virulence in a rabbit model of infective endocarditis (17).

100 In low-GC Gram-positive bacteria such as *E. faecalis*, (p)ppGpp controls transcription of  
101 nutrient uptake and amino acid biosynthesis genes via the branched-chain amino acid (BCAA)-  
102 and GTP-sensing CodY regulator (20). It follows that (p)ppGpp accumulation during BCAA  
103 starvation severely depletes intracellular GTP pools in all Firmicutes such that CodY regulation  
104 is severely impaired due to depletion of its two co-factors (20). We recently confirmed the

105 existence of the (p)ppGpp-CodY network in *E. faecalis* and demonstrated that inactivation of  
106 *codY* restored several phenotypes of the (p)ppGpp<sup>0</sup> mutant strain, including virulence in *G.*  
107 *mellonella* (16). However, the contribution of the global nutritional regulator CodY to  
108 enterococcal pathogenesis in mammalian hosts remains unknown.

109 In this work, we examined the contribution of the (p)ppGpp and CodY to the  
110 pathogenesis of *E. faecalis* in a murine CAUTI model (21). We discovered that, in separate,  
111 basal levels of (p)ppGpp and the transcriptional regulator CodY promote biofilm formation in  
112 urine under *in vitro* conditions as well as virulence in a murine CAUTI model. Global  
113 transcriptome analysis validate earlier findings that deletion of *codY* restores, at least in part, the  
114 dysregulated metabolism of the cell in the absence of (p)ppGpp. Finally, targeted mRNA  
115 quantifications reveal that the (p)ppGpp/CodY network alters expression of genes coding for  
116 cyclic di-adenosine monophosphate (c-di-AMP) biosynthetic enzymes and of CAUTI virulence  
117 factors. Altogether, this study identifies the (p)ppGpp-CodY network as a contributor to  
118 enterococcal catheter colonization in the urinary tract and further supports that basal levels of  
119 (p)ppGpp promote bacterial virulence through maintenance of a balanced bacterial metabolism.

120

## 121 **Results**

122 **The (p)ppGpp<sup>0</sup> and  $\Delta codY$  strains show impaired colonization in a murine CAUTI**  
123 **model.** We compared the ability of the *E. faecalis* OG1RF parent,  $\Delta rel$ ,  $\Delta rel/Q$ , (p)ppGpp<sup>0</sup>,  
124  $\Delta codY$  and (p)ppGpp<sup>0</sup> $\Delta codY$  strains to colonize and persist in the bladder of catheterized mice.  
125 Briefly, catheters were implanted into the bladder of C57BL/6Ncr mice prior to transurethral  
126 inoculation with  $\sim 2 \times 10^7$  CFU of each designated strain. Three days post-infection, the OG1RF  
127 strain was readily recovered from bladders ( $6.3 \pm 0.6 \log_{10}$  CFU) and catheters ( $6.0 \pm 0.3 \log_{10}$   
128 CFU) of all infected animals (Fig. 1). Inactivation of *rel* ( $\Delta rel$ ) or *rel/Q* ( $\Delta rel/Q$ ) did not significantly  
129 alter *E. faecalis* colonization in bladders, but recovery of  $\Delta rel/Q$  from catheters was significantly  
130 lower ( $\sim 0.8 \log_{10}$  reduction,  $p = 0.0027$  when compared to OG1RF). On the other hand, the

131 (p)ppGpp<sup>0</sup> strain displayed ~ 0.8 log<sub>10</sub> (p=0.0015) and 1.5 log<sub>10</sub> (p<0.0001) reductions in CFU  
132 recovered from bladders and catheters, respectively (Fig. 1). The  $\Delta codY$  strain phenocopied the  
133 (p)ppGpp<sup>0</sup> strain showing ~ 0.8 log<sub>10</sub> reductions in CFU recovered from both bladders  
134 (p=0.0156) and catheters (p=0.0031) (Fig. 1). However, inactivation of *codY* in the (p)ppGpp<sup>0</sup>  
135 background [(p)ppGpp<sup>0</sup> $\Delta codY$  triple mutant] restored bacterial bladder and catheter colonization  
136 to near parent strain levels. In relative agreement with the bacterial loads detected on catheters  
137 and in bladders, only the OG1RF and  $\Delta rel$  strains were consistently able to ascend and persist  
138 in mice kidneys three days post-infection (Fig. 1C).

139

140 **(p)ppGpp promotes timely growth of *E. faecalis* in human urine.** The (p)ppGpp<sup>0</sup>  
141 strain was previously shown to have growth and survival defects in whole blood and serum (15,  
142 16). Interestingly, inactivation of *codY* in the (p)ppGpp<sup>0</sup> background [(p)ppGpp<sup>0</sup> $\Delta codY$ ] restored  
143 the (p)ppGpp<sup>0</sup> growth defect in blood but not in serum (16). Here, we tested the ability of  
144 (p)ppGpp-defective ( $\Delta rel$ ,  $\Delta rel/Q$  and (p)ppGpp<sup>0</sup>) and *codY* ( $\Delta codY$  and (p)ppGpp<sup>0</sup> $\Delta codY$ )  
145 strains to replicate in pooled human urine *ex vivo*. Despite the colonization defect in the murine  
146 CAUTI model (Fig. 1), the  $\Delta codY$  strain grew as well as the parent and  $\Delta rel/Q$  strains (Fig. 2).  
147 On the other hand,  $\Delta rel$ , (p)ppGpp<sup>0</sup>, and (p)ppGpp<sup>0</sup> $\Delta codY$  strains grew slower in the first 12  
148 hours of incubation, with ~ 0.6 log<sub>10</sub> CFU difference at 3 and 7 hours post-inoculation (Fig. 2).  
149 Nevertheless, upon entering stationary phase, all strains reached similar growth yields and  
150 remained viable for at least 24 hours.

151

152 **(p)ppGpp and CodY support biofilm formation in urine.** Biofilm formation on urinary  
153 catheters is critical for enterococcal CAUTI (22-24). This is exemplified by the observation that  
154 *E. faecalis* OG1RF requires the presence of a catheter to persist for more than 48 hours in  
155 murine bladders (21). Follow up studies revealed that catheterization, in mice and in humans,  
156 triggers an inflammatory response that releases the host protein fibrinogen, which is used by *E.*

157 *faecalis* as a nutrient as well as a scaffold to adhere and colonize the catheter surface (22-25).  
158 Taking into account that the reduction in bacterial counts of  $\Delta re/Q$ , (p)ppGpp<sup>0</sup> and  $\Delta codY$  strains  
159 was more pronounced on catheters than in bladders (Fig. 1) and that (p)ppGpp supports long-  
160 term survival of *E. faecalis* in biofilms (12), we sought to investigate if the attenuated virulence  
161 of these strains in murine CAUTI was linked to a reduced ability to form biofilms on fibrinogen-  
162 coated surfaces in the presence of urine. Since catheterization normally elicits proteinuria in the  
163 host, and *E. faecalis* requires a protein source to optimally form biofilms in urine (22, 24), human  
164 urine was supplemented with bovine serum albumin (BSA). In agreement with the bacterial  
165 loads obtained from the implanted catheters (Fig. 1B), quantifications of *E. faecalis* biofilm  
166 biomass revealed that  $\Delta re/Q$ , (p)ppGpp<sup>0</sup> and  $\Delta codY$  strains were deficient in biofilm production  
167 while the  $\Delta reI$  strain phenocopied the parent OG1RF strain (Fig. 3A). Notably, inactivation of  
168 *codY* in the (p)ppGpp<sup>0</sup> background alleviated the defective phenotype of the (p)ppGpp<sup>0</sup> strain  
169 albeit the differences between the (p)ppGpp<sup>0</sup> $\Delta codY$  and OG1RF strains were still statistically  
170 significant.

171 As indicated above, the main factor involved in *E. faecalis* biofilm formation on urinary  
172 catheters is production of the Ebp pilus, which binds directly to fibrinogen via the EbpA N-  
173 terminal domain (22, 26, 27). Quantification of EbpA via ELISA showed no noticeable reductions  
174 in EbpA production in any of the mutant strains (Fig. 3B) suggesting that the (p)ppGpp/CodY  
175 network promotes biofilm formation of fibrinogen-coated surfaces in an Ebp-independent  
176 manner.

177

### 178 **Inactivation of *codY* restores the dysregulated metabolism of the (p)ppGpp<sup>0</sup> strain.**

179 Previously, we proposed that the virulence attenuation of the (p)ppGpp<sup>0</sup> strain in different animal  
180 models is, in large part, due to the dysregulated metabolism caused by lack of (p)ppGpp control  
181 (13, 14, 16). By monitoring H<sub>2</sub>O<sub>2</sub> production and the culture pH, we provided the first evidence  
182 that inactivation of *codY* restored a balanced metabolism to the (p)ppGpp<sup>0</sup> background strain

183 (16). To obtain additional insights into the (p)ppGpp-CodY relationship, we used RNA  
184 sequencing (RNA-seq) technology to compare the transcriptome of OG1RF, (p)ppGpp<sup>0</sup> and  
185 (p)ppGpp<sup>0</sup> $\Delta$ *codY* strains grown to mid-exponential phase in the chemically-defined FMC  
186 medium (28) supplemented with 10 mM glucose (FMCG). In the (p)ppGpp<sup>0</sup> strain, 690 genes  
187 were differentially expressed when compared to OG1RF (Table S1,  $p < 0.05$ , 2-fold cutoff),  
188 representing ~ 27% of the entire *E. faecalis* OG1RF genome. In agreement with a previous  
189 microarray analysis (14), multiple PTS systems as well as citrate, glycerol, malate and serine  
190 utilization pathways were strongly induced in the (p)ppGpp<sup>0</sup> strain under these conditions. A  
191 selected and representative number of dysregulated transport and metabolic genes in the  
192 (p)ppGpp<sup>0</sup> strain are shown, respectively, in Tables 1 and 2. The upregulation of alternate  
193 carbon metabolism genes that are expected to be under carbon catabolite repression (CCR) in  
194 the glucose-rich condition of the FMCG medium indicates that complete lack of (p)ppGpp places  
195 *E. faecalis* in what we have originally termed a “transcriptionally-relaxed” state (14). When  
196 compared to the parent strain, 737 genes (~ 29% of entire genome) were differentially  
197 expressed in the (p)ppGpp<sup>0</sup> $\Delta$ *codY* triple mutant strain (Table S2,  $p < 0.05$ , 2-fold cutoff). Despite  
198 the even large number of differentially expressed genes, inactivation of *codY* in the (p)ppGpp<sup>0</sup>  
199 background strain normalized transcription of 274 genes that were dysregulated in the  
200 (p)ppGpp<sup>0</sup> background (Table S3). The great majority (~ 95%) of these genes were upregulated  
201 in the (p)ppGpp<sup>0</sup> strain, supporting that deletion of *codY* abrogates, at least in part, the  
202 “transcriptionally-relaxed” state of the (p)ppGpp<sup>0</sup> mutant. More specifically, inactivation of *codY*  
203 in the (p)ppGpp<sup>0</sup> background normalized transcription (or brought to levels much closer to the  
204 parent strain) of ~ 70 transport systems as well as over 130 metabolic genes including citrate,  
205 glycerol, malate, and serine utilization pathways, dehydrogenases, and molybdenum-dependent  
206 enzymes (Table S3).  
207



208 **Dysregulation of c-di-AMP homeostasis may affect fitness of (p)ppGpp<sup>0</sup> and**  
209  **$\Delta$ codY strains in urine.** Previously, the Ebp pilus and two high-affinity manganese  
210 transporters, EfaCBA and MntH2, were shown to be essential for *E. faecalis* virulence in a  
211 mouse CAUTI model (27, 29). In an attempt to identify (p)ppGpp- and CodY-dependent  
212 processes directly relevant to enterococcal CAUTI, we compared the transcriptional profile of  
213 these virulence factors in parent and mutant strains. In brief, quantitative real-time PCR (qPCR)  
214 was used to compare expression of selected genes in exponentially-grown BHI cultures of  
215 OG1RF,  $\Delta$ codY, (p)ppGpp<sup>0</sup> and (p)ppGpp<sup>0</sup> $\Delta$ codY strains before and after switching to pooled  
216 human urine. We found that transcription of *ebpA* (coding for the pilin sub-unit), *efaC* (the ATP-  
217 binding subunit of the ABC-type transporter EfaCBA) and *mntH2* was strongly induced upon  
218 shifting the parent strain culture from BHI to urine (Fig. 4). While full upregulation of *efaC* in  
219 urine appears to be dependent on CodY, *ebpA* and *mntH2* transcription was differentially  
220 impacted by (p)ppGpp and CodY. Specifically, while inactivation of CodY ( $\Delta$ codY) limited  
221 induction of these genes after transition to urine, loss of (p)ppGpp induced transcription of *ebpA*  
222 and *mntH2* by ~ 10-fold. Simultaneous inactivation of *codY* in the (p)ppGpp<sup>0</sup> background  
223 [(p)ppGpp<sup>0</sup> $\Delta$ codY] modestly raised *ebpA* but fully restored *mntH2* mRNA levels (Fig. 4).

224 We also assessed transcription levels of genes coding for enzymes involved in c-di-AMP  
225 metabolism, a nucleotide second messenger essential for osmotic stress survival and whose  
226 regulatory network appears to be intertwined with the (p)ppGpp regulatory network in other  
227 bacteria (30-34). In the OG1RF strain, transcription of the c-di-AMP cyclase *cdaA* was not  
228 significantly altered upon transition from BHI to urine; however, transcription of both c-di-AMP  
229 hydrolases (*pde* and *gdpP*) was induced by ~ 50- to 100-fold, respectively (Fig. 4). While  
230 induction of *gdpP* was dependent on CodY, activation of *pde* in urine was not as robust in all  
231 mutants strains. Unexpectedly, *cdaA* transcription was strongly induced (~ 50-fold) in the  
232 (p)ppGpp<sup>0</sup> strain when shifted from BHI to urine, suggesting that c-di-AMP levels may be

233 dysregulated in the (p)ppGpp<sup>0</sup> strain during CAUTI. Notably, c-di-AMP pools must be tightly  
234 controlled given that it is essential for growth but also highly toxic when present at high  
235 concentrations (35).

236

## 237 **Discussion**

238 In this report, we showed that basal (p)ppGpp pools and the transcriptional regulator  
239 CodY mediate virulence of *E. faecalis* in a murine CAUTI model. These results corroborates  
240 previous findings that changes in basal levels of (p)ppGpp contribute to the virulence of *E.*  
241 *faecalis* (10, 11, 13, 15, 17) and show, for the first time, that CodY regulation is also important  
242 for the virulence of *E. faecalis*. Despite the attenuated virulence of the  $\Delta codY$ ,  $\Delta relQ$  and  
243 (p)ppGpp<sup>0</sup> strains, simultaneous inactivation of both regulatory pathways [(p)ppGpp<sup>0</sup> $\Delta codY$   
244 strain] restored virulence to near parent strain levels. While this finding may appear  
245 contradictory, it is in line with previous studies showing that inactivation of *codY* restores  
246 virulence of (p)ppGpp<sup>0</sup> strains in *Listeria monocytogenes* and *Staphylococcus aureus* (36, 37).

247 The association between (p)ppGpp and CodY, by which (p)ppGpp upregulates gene  
248 transcription via GTP depletion and concomitant alleviation of CodY repression, has been well  
249 established (20). We previously found that the (p)ppGpp and CodY regulatory networks are also  
250 intertwined in *E. faecalis* by showing that inactivation of *codY* restored phenotypes of the  
251 (p)ppGpp<sup>0</sup> strain, such as the inability to grow in whole blood *ex vivo* and reduced virulence in  
252 the *G. mellonella* invertebrate model (16). By comparing final culture pH and H<sub>2</sub>O<sub>2</sub> production of  
253 (p)ppGpp<sup>0</sup> and (p)ppGpp<sup>0</sup> $\Delta codY$  strains, we hypothesized that deletion of *codY* restores a  
254 balanced metabolism to the (p)ppGpp<sup>0</sup> strain (14, 16). The RNA-seq analysis reported here  
255 clearly supports this observation as multiple genes coding for alternate carbon utilization  
256 pathways were strongly upregulated in the (p)ppGpp<sup>0</sup> strain but not in the (p)ppGpp<sup>0</sup> $\Delta codY$   
257 triple mutant strain.

258 Our results also indicate that restoration of global metabolism in the (p)ppGpp<sup>0</sup>Δ*codY*  
259 strain when compared to the (p)ppGpp<sup>0</sup> strain may be particularly relevant in experimental  
260 CAUTI. Specifically, we show that while absence of either (p)ppGpp or CodY results in defects  
261 in biofilm formation *in vitro* and *in vivo*, simultaneous inactivation of the (p)ppGpp and CodY  
262 regulatory systems restores CAUTI virulence and partially restores *in vitro* biofilm formation to  
263 near parent strain levels (Fig 1. and Fig. 3). Considering that the levels of the surface protein  
264 EbpA was not altered in any of the mutant strains (Fig. 3), we propose that (p)ppGpp and CodY  
265 promote biofilm formation on urinary catheters by mediating the metabolic rearrangements  
266 required for biofilm growth and survival in urine. In fact, a comparative transcriptome analysis  
267 reveals that several metabolic pathways previously identified as relevant to enterococcal  
268 adaptation to growth in urine (38) overlap with the (p)ppGpp and CodY regulons (13, 14, 20).  
269 For example, transcriptional activation of alternate carbon utilization and amino acid  
270 biosynthesis/transport genes in response to the relatively low urinary concentrations of amino  
271 acids and glucose (38-41) are shown here to be regulated by (p)ppGpp and CodY (Table S1,  
272 Table 1 and Table 2) (13, 14, 20).

273 In an attempt to identify specific (p)ppGpp- and CodY-regulated processes that are  
274 important for CAUTI, we used qPCR to compare transcription of known virulence factors such  
275 as the Ebp pilus and the metal transporters EfaCBA and MntH2 (27, 29) in parent and mutant  
276 strains. Although there were significant alterations in transcription of *ebpA*, *efaC* and *mntH2* in  
277 the (p)ppGpp and *codY* mutant strains, it was not possible to establish a firm correlation  
278 between the transcriptional expression of these virulence factors and the attenuated virulence  
279 phenotypes shown in Figure 1. Due to the association of c-di-AMP signaling with biofilm  
280 formation (33, 34) and adaptation to osmotic stress (31, 32) – two relevant traits during CAUTI –  
281 and the previous linkage with (p)ppGpp signaling (30, 35, 42), we similarly assessed gene  
282 expression of the enzymes responsible for c-di-AMP synthesis (*cdaA*) and degradation (*pde* and  
283 *gdpP*). c-di-AMP is an emerging regulatory nucleotide shown to control a number of cellular

284 processes, including potassium homeostasis, osmotic adaptation and biofilm formation (35). In  
285 addition, previous investigations revealed an intricate but poorly understood association  
286 between the c-di-AMP and (p)ppGpp signaling networks, in which (p)ppGpp regulates c-di-AMP  
287 levels by serving as an allosteric regulator of c-di-AMP phosphodiesterase (PDE) enzymes,  
288 while c-di-AMP stimulates (p)ppGpp synthesis via an unknown mechanism (30, 35, 42). The  
289 strong activation of *pde* and *gdpP* in the parent strain upon shift to urine suggests that  
290 intracellular c-di-AMP levels decrease in the presence of urine. This is not surprising  
291 considering that salt concentrations in urine are generally high (average osmolality between 300  
292 to 900 mOsm/kg H<sub>2</sub>O), and that low c-di-AMP pools are associated with bacterial salt tolerance  
293 (43) whereas increased c-di-AMP levels are linked to salt hypersensitivity (44-46). Interestingly,  
294 transcription of the c-di-AMP synthetase gene (*cdaA*) in urine was approximately 100-fold higher  
295 in the (p)ppGpp<sup>0</sup> strain when compared to the parent strain, indicating that c-di-AMP  
296 homeostasis may be severely disrupted in the (p)ppGpp<sup>0</sup> strain. Finally, transcription of the *pde*  
297 and *gdpP* genes was not as strongly induced (or not induced at all) in the (p)ppGpp<sup>0</sup> and  $\Delta codY$   
298 strains. While the cellular levels c-di-AMP in cells grown in urine remain to be determined, and  
299 the possibility of the (p)ppGpp/c-di-AMP signaling crosstalk in *E. faecalis* confirmed, the qPCR  
300 analysis suggests that *E. faecalis* lowers c-di-AMP pools to adjust its metabolism to the  
301 environment (i.e. high osmolality) encountered in urine.

302 By comparing the genes restored by *codY* inactivation in our RNA-Seq analysis (Table  
303 S1, Table 1 and Table 2) to the transcriptome of *E. faecalis* OG1RF grown in urine (38), several  
304 other common pathways were identified providing additional leads as to why alleviation of CodY  
305 repression restored the biofilm defect of the (p)ppGpp<sup>0</sup> strain. Specifically, Vebø *et al.* showed  
306 that transcription of a major glycerol uptake system was induced when the OG1RF strain was  
307 grown in urine *ex vivo*, suggesting that *E. faecalis* utilizes glycerol as a source of energy to grow  
308 and survive in urine (38). Notably, aerobic metabolism of glycerol by the GlpO enzyme is also  
309 the main source of H<sub>2</sub>O<sub>2</sub> generation in *E. faecalis* (47) and *E. faecalis* activates transcription of

310 several oxidative genes (such as *sodA*, *npr* and *trxB*) when grown in urine (38), possibly to cope  
311 with increased ROS generation caused by aerobic glycerol metabolism. In agreement with  
312 previous microarray data (14), the current RNA-seq analysis revealed that transcription of  
313 glycerol catabolic genes, such as *glpO* and *gldA2*, was activated by 6-fold or more in the  
314 (p)ppGpp<sup>0</sup> strain (Table S1, Table 2), likely augmenting ROS production in the urinary tract.  
315 Another possibility, which is not mutually exclusive from the others, is that the strong (~ 20-fold)  
316 upregulation of molybdenum metabolism genes in the (p)ppGpp<sup>0</sup> strain is disadvantageous to *E.*  
317 *faecalis* when grown in the urinary tract environment. Molybdenum is a rare transition metal that  
318 functions as a co-factor of several redox active enzymes (48-50); it should be noted that  
319 urothione, the degradation product of the molybdenum cofactor in humans, is excreted in urine  
320 (51). In contrast to other metal co-factors, molybdenum is catalytically active only when  
321 complexed with a pterin-based scaffold, forming the Moco prosthetic group (50). The Moco  
322 biosynthetic genes that are highly induced in the (p)ppGpp<sup>0</sup> mutant strain code for enzymes that  
323 require GTP and the oxygen-reactive iron and copper metals (50), possibly linking molybdenum  
324 metabolism to (p)ppGpp and oxidative stress. Finally, *E. faecalis* appears to downregulate  
325 serine catabolism in urine (38). However, serine dehydratases were among the most highly  
326 expressed genes in the (p)ppGpp<sup>0</sup> strain (~ 100-fold), likely favoring pyruvate generation  
327 instead of protein synthesis. While it is unknown how serine catabolism and dysregulation of  
328 other metabolic and transport pathways affect biofilm formation and virulence in *E. faecalis*,  
329 alleviation of CodY repression for the most part restored transcription of these genes to wild-  
330 type levels.

331 Collectively, the results presented here reveal that (p)ppGpp and CodY support *E.*  
332 *faecalis* presence in the catheterized murine urinary tract by controlling the metabolic  
333 arrangements necessary for the fitness of *E. faecalis* in this environment and, possibly, by  
334 modulating biofilm formation. Future studies using global transcriptome and metabolome  
335 analysis of (p)ppGpp-deficient and CodY-deficient strains recovered directly from CAUTI,

336 coupled with characterization of pathways relevant to biofilm formation in urine, are necessary  
337 to fully understand how alleviation of CodY repression restores biofilm formation in the absence  
338 of (p)ppGpp. In addition, the relevance of c-di-AMP signaling to enterococcal CAUTI and the  
339 relationship between (p)ppGpp and c-di-AMP signaling pathways will warrant further  
340 investigations. In this regard, work is underway to determine the scope and targets of c-di-AMP  
341 regulation in *E. faecalis*. These studies should expand our mechanistic understanding of how  
342 global metabolic regulators such as CodY, (p)ppGpp and possibly c-di-AMP mediate  
343 enterococcal pathogenesis in the urinary tract and beyond.

344

## 345 **Materials and Methods**

346 **Bacterial strains and growth conditions.** The parent *E. faecalis* OG1RF strain and its  
347 derivatives  $\Delta rel$ ,  $\Delta relQ$ ,  $\Delta rel\Delta relQ$  [(p)ppGpp<sup>0</sup>],  $\Delta codY$  and (p)ppGpp<sup>0</sup> $\Delta codY$  strains have been  
348 previously described (10, 16). All strains were routinely grown in BHI at 37°C. For RNA-seq  
349 analysis, overnight cultures of *E. faecalis* OG1RF, (p)ppGpp<sup>0</sup>, and (p)ppGpp<sup>0</sup> $\Delta codY$  strains  
350 were diluted in a 1:100 ratio in 50 ml of the chemically-defined FMC medium (28) supplemented  
351 with 10 mM glucose (FMCG) and allowed to grow statically at 37°C to an OD<sub>600</sub> of 0.3. Growth  
352 in pooled human urine from healthy donors (Lee Biosolutions) was monitored as described  
353 elsewhere, with minor modifications (29). Briefly, overnight cultures were diluted 1:100 in PBS  
354 and inoculated 1:100 for growth assessment in urine. Cultures were incubated aerobically at  
355 37°C and, at selected time-points, aliquots were serially diluted and plated on TSA plates for  
356 colony-forming unit (CFU) determination. To determine the transcriptional responses of selected  
357 genes upon transition from laboratory media to human urine, overnight cultures grown in BHI  
358 were diluted 1:20 in 5 ml of fresh sterile BHI and allowed to grow statically at 37°C to an OD<sub>600</sub>  
359 of 0.5. The bacterial cells were washed twice with PBS (pH 7.0) and pelleted down by  
360 centrifuging at 2500 rpm for 8 min. After washing, pellets were resuspended in 7.5 ml filter

361 sterilized urine and incubated at 37°C for 30 min. The controls were resuspended in the same  
362 volume of fresh BHI and incubated at 37°C for 30 min.

363

364 **Mouse catheter implantation and infection.** The mice used in this study were 6-week-old  
365 female wild-type C57BL/6Ncr mice purchased from Charles River Laboratories. Mice were  
366 subjected to transurethral implantation and inoculated as previously described (21). Mice were  
367 anesthetized by inhalation of isoflurane and implanted with a 5-mm length platinum-cured  
368 silicone catheter. When indicated, mice were infected immediately following catheter  
369 implantation with 50 µl of  $\sim 2 \times 10^7$  CFU of bacteria in PBS introduced into the bladder lumen by  
370 transurethral inoculation as previously described (21). To harvest the catheters and organs,  
371 mice were sacrificed 3 days post-infection by cervical dislocation after anesthesia inhalation;  
372 silicone catheter, bladder and kidneys were aseptically harvested. The Washington University  
373 Animal Studies Committee approved all mouse infections and procedures as part of protocol  
374 number 20150226. All animal care was consistent with the Guide for the Care and Use of  
375 Laboratory Animals from the National Research Council and the USDA Animal Care Resource  
376 Guide.

377

378 **Biofilm formation in human urine.** For assessment of biofilm formation on fibrinogen-coated  
379 96-well polystyrene plates (Grenier CellSTAR), wells were coated overnight at 4°C with 100 µg  
380 ml<sup>-1</sup> human fibrinogen free of plasminogen and von Willebrand Factor (Enzyme Research  
381 Laboratory). The next day, *E. faecalis* overnight cultures were diluted to an optical density  
382 (OD<sub>600</sub>) of 0.2 in BHI broth. The diluted cultures were centrifuged, washed three times with 1x  
383 PBS, and diluted 1:100 in urine supplemented with 20 mg ml<sup>-1</sup> BSA. Bacterial cells were  
384 allowed to attach to the fibrinogen-coated plate at 37°C under static conditions as described  
385 in(29, 52). After 24 hours, microplates were washed with PBS to remove unbound bacteria and  
386 biofilm formation assessed by staining wells with crystal violet as previously described (52).

387 Excess dye was removed by rinsing with sterile water and then plates were allowed to dry at  
388 room temperature. Biofilms were resuspended with 200  $\mu$ l of 33% acetic acid and the  
389 absorbance at 595 nm was measured on a microplate reader (Molecular Devices). Experiments  
390 were performed independently in triplicate per condition and per experiment.

391

392 **Presence of EbpA on the cell surface of (p)ppGpp- and CodY-deficient strains.** Surface  
393 expression of EbpA by *E. faecalis* OG1RF and derivatives was determined by ELISA as  
394 previously described (23). Bacterial strains were grown for 18 hours in urine supplemented with  
395 20 mg ml<sup>-1</sup> of BSA. Then bacterial cells were washed (3 times) with PBS, normalized to an  
396 OD<sub>600</sub> of 0.5, resuspended with 50 mM carbonate buffer (pH 9.6) containing 0.1% sodium azide  
397 and used (100  $\mu$ l) to coat Immulon 4HBX microtiter plates overnight at 4°C. The next day, plates  
398 were 3 times washed with PBS containing 0.05% Tween 20 (PBS-T) to remove unbound  
399 bacteria and blocked for 2 h with 1.5% bovine serum albumin (BSA)–0.1% sodium azide–PBS  
400 followed by three PBS-T washes. EbpA surface expression was detected using mouse anti-  
401 EbpA<sup>Full</sup> antisera, which was diluted 1:100 in dilution buffer (PBS with 0.05% Tween 20, 0.1%  
402 BSA, and 0.5% methyl  $\alpha$ -d-mannopyranoside) before serial dilutions were performed. A 100- $\mu$ l  
403 volume was added to the plate, and the reaction mixture was incubated for 2 h. Subsequently,  
404 plates were washed with PBS-T, incubated for 1h with HRP-conjugated goat anti-rabbit antisera  
405 (1:2,000), and washed again with PBS-T. Detection was performed using a TMB substrate  
406 reagent set (BD). The reaction mixtures were incubated for 5 min to allow color to develop, and  
407 the reactions were then stopped by the addition of 1.0 M sulfuric acid. The absorbance was  
408 determined at 450 nm. Titers were defined by the last dilution with an A<sub>450</sub> of at least 0.2. As an  
409 additional control, rabbit anti-*Streptococcus* group D antiserum was used to verify that whole  
410 cells of all strains were bound to the microtiter plates at similar levels. EbpA expression titers  
411 were normalized against the bacterial titers at the same dilution.

412



413 **RNA-seq analysis.** Cells grown in FMCG to OD<sub>600</sub> 0.3 were collected by centrifugation at 4000  
414 rpm for 20 min at 4°C, and resuspended in 4 ml of sterile RNA stabilizing solution [3.5 M  
415 (NH<sub>4</sub>)<sub>2</sub>SO<sub>4</sub>, 16.6 mM sodium citrate, 13.3 mM EDTA, adjusted to a pH of 5.2 with H<sub>2</sub>SO<sub>4</sub>]. After  
416 a 10 min incubation at room temperature, cells were centrifuged at 4000 rpm for 30 min at 4°C,  
417 and pellets were stored at - 80°C. RNA was extracted using the hot acid-phenol:chloroform  
418 method previously described (53). Subsequently, precipitated RNA was treated once with  
419 DNase I (Ambion, Carlsbad, CA), followed by a second DNase I treatment using the DNA-free  
420 kit (Ambion) to completely remove DNA, divalent cations and traces of the DNase I enzyme  
421 (204). RNA concentrations were quantified with the NanoDrop 1000 spectrophotometer  
422 (NanoDrop, Wilmington, DE) and RNA quality assessed with the Agilent Bioanalyzer (Agilent,  
423 Santa Clara, CA). RNA sequencing (RNA-Seq), data processing and statistical analysis was  
424 performed at the University of Rochester Genomics Research Center (UR-GRC) using the  
425 Illumina platform as previously described (54). Gene expression data have been deposited in  
426 the NCBI Gene Expression Omnibus (GEO) database ([www.ncbi.nlm.nih.gov/geo](http://www.ncbi.nlm.nih.gov/geo)) under GEO  
427 Series Accession number GSE131749

428  
429 **Real-time quantitative PCR analysis.** Cultures were pelleted at 2500 rpm for 8 min at 4°C.  
430 The bacterial pellets were resuspended in 1 ml of RNA protect and incubated for 5 min at room  
431 temperature followed by centrifugation at 2500 rpm for 8 min at 4°C. At that point, the bacterial  
432 pellets were kept at -80°C until ready for RNA extraction. Cells were resuspended in TE buffer  
433 (10 mM Tris Cl [pH 8], 1mM EDTA) and 10 % SDS, homogenized for three 30 second cycles,  
434 with 2 min on ice between cycles. The nucleic acids were retrieved from the total protein by  
435 phenol:chloroform (5:1) extraction. The inorganic phase was resuspended in 0.7 ml RLT buffer  
436 (Qiagen) supplemented with 1 % β-mercaptoethanol, and RNA was purified using RNeasy mini  
437 kit (Qiagen), including the on-column DNase treatment recommended by the supplier. To further  
438 reduce the DNA contamination, RNA samples were treated with DNase I (Ambion) at 37°C for

439 30 min and were re-purified using RNeasy mini kit (Qiagen). RNA concentrations were  
440 determined using Nanodrop. Reverse transcription and real-time PCR were carried out  
441 according to protocols described previously (53) using the primer sets indicated in **Table S4**.

442

443 **Statistical Analysis.** Data sets were analyzed using GraphPad Prism 6.0 software unless  
444 otherwise noted. Log<sub>10</sub>-transformed CFU values from urine growth curves were analyzed via a  
445 two-way ANOVA followed by comparison post-test. For CAUTI experiments, biofilm assays and  
446 EbpA ELISA, a Two-tailed Mann-Whitney *U* test was performed. RNA-seq processing and the  
447 subsequent statistical analysis was performed at the University of Rochester Genomics  
448 Research Center (UR-GRC) as previously described (54). qPCR data was analyzed by  
449 Student's *t*-test and ANOVA with multiple comparisons test, respectively.

450

451 **Acknowledgements.** This research was supported by grants from the National Institute of  
452 Allergy and Infectious Disease AI135158 (JAL) and AI10874901 (SJH), and the National  
453 Institute of Diabetes and Digestive Kidney Diseases DK051406 (SJH) and P50-DK0645400  
454 (SJH). CCW was supported by the American Heart Association GSA Predoctoral Fellowship  
455 16PRE29860000. The funders had no role in study design, data collection and analysis,  
456 decision to publish, or preparation of the manuscript.

457

458 **Table 1.** Transcriptional restoration of selected nutrient transport systems upon inactivation of  
 459 *codY* in the (p)ppGpp<sup>0</sup> background.

| Locus/ gene name      | Function                       | Fold change*          | Fold change                         |
|-----------------------|--------------------------------|-----------------------|-------------------------------------|
|                       |                                | (p)ppGpp <sup>0</sup> | (p)ppGpp <sup>0</sup> Δ <i>codY</i> |
| PTS systems           |                                |                       |                                     |
| OG1RF_10341           | PTS system                     | + 5.5                 |                                     |
| OG1RF_10346           | PTS system                     | + 4.8                 |                                     |
| OG1RF_10433           | PTS system                     | + 5.1                 |                                     |
| OG1RF_10746           | PTS system                     | + 8.2                 |                                     |
| OG1RF_11236           | PTS system                     | + 3.3                 |                                     |
| OG1RF_11249           | PTS system                     | + 3.1                 | - 3.3                               |
| OG1RF_11512           | PTS system                     | + 5.0                 |                                     |
| OG1RF_11614           | PTS system                     | + 4.2                 |                                     |
| OG1RF_11780           | PTS system                     | + 3.8                 |                                     |
| OG1RF_12261           | PTS system                     | + 4.6                 |                                     |
| <i>bglP</i>           | PTS system, β-glucoside uptake | + 7.4                 |                                     |
| <i>frwB</i>           | PTS system, fructose uptake    | + 11.5                |                                     |
| <i>malX</i>           | PTS system, maltose uptake     | + 4.7                 |                                     |
| <i>mltF2</i>          | PTS system, mannitol uptake    | + 7.1                 |                                     |
| <i>scrA</i>           | PTS system, β-glucoside uptake | + 3.4                 |                                     |
| <i>sorA</i>           | PTS system, sorbose uptake     | + 32.5                |                                     |
| <i>treB</i>           | PTS systems, trehalose uptake  | + 11.9                | - 2.0                               |
| <i>ulaB</i>           | PTS system, ascorbate uptake   | + 5.1                 |                                     |
| ABC-type transporters |                                |                       |                                     |
| OG1RF_10665           | ABC-type transporter           | + 3.4                 | - 2.5                               |
| OG1RF_10879           | ABC-type transporter           | + 2.2                 |                                     |
| OG1RF_11003           | ABC-type transporter           | + 15.9                |                                     |
| OG1RF_11188           | ABC-type transporter           | + 8.1                 |                                     |
| OG1RF_11763           | ABC-type transporter           | + 3.2                 |                                     |
| OG1RF_11774           | Sugar ABC-type transporter     | + 38.5                |                                     |
| OG1RF_12466           | ABC-type transporter           | + 3.5                 |                                     |
| <i>mdlB</i>           | Multidrug ABC-type transporter | + 3.2                 |                                     |
| <i>modB</i>           | Molybdenum transporter         | + 31.5                |                                     |
| T0                    | Oligopeptide transporter       | - 3.3                 |                                     |
| <i>ziaA</i>           | Zinc ABC-type transporter      | + 3.2                 |                                     |
| Other porters         |                                |                       |                                     |
| OG1RF_11781           | Sodium symporter               | + 5.3                 |                                     |
| OG1RF_11873           | Phosphate transporter          | + 4.5                 | - 2.5                               |
| OG1RF_11954           | Xanthine/Uracil permease       | + 3.0                 |                                     |
| OG1RF_12019           | Gluconate symporter            | + 4.7                 |                                     |
| OG1RF_12274           | Major Facilitator transporter  | + 21.3                |                                     |
| OG1RF_12280           | Cytosine/purine permease       | + 5.4                 |                                     |
| OG1RF_12572           | Citrate transporter            | + 51.8                |                                     |
| <i>dctM</i>           | Organic Acid transporter       | + 4.5                 |                                     |
| <i>glpF2</i>          | Glycerol uptake                | + 11.0                |                                     |

460 (\*) Values represent fold-change in transcription when compared to the parent strain. All values  
 461 shown were statistically significant ( $p < 0.05$ ). Blank fields indicate that there were no significant  
 462 differences between mutant and parent strains.

463 **Table 2.** Transcriptional profile of selected metabolic genes upon inactivation of *codY* in the  
464 (p)ppGpp<sup>0</sup> background.

| <b>Locus/ gene name</b>      | <b>Function</b>                        | <b>Fold change*</b>   | <b>Fold change</b>                  |
|------------------------------|----------------------------------------|-----------------------|-------------------------------------|
|                              |                                        | (p)ppGpp <sup>0</sup> | (p)ppGpp <sup>0</sup> Δ <i>codY</i> |
| <u>Citrate metabolism</u>    |                                        |                       |                                     |
| OG1RF_10979                  | Citrate carrier                        | + 31.2                |                                     |
| <i>citC</i>                  | Citrate metabolism                     | + 17.0                | - 5.0                               |
| <i>citD</i>                  | Citrate metabolism                     | + 18.7                | - 3.3                               |
| <i>citE</i>                  | Citrate metabolism                     | + 15.6                | - 5.0                               |
| <i>citF</i>                  | Citrate metabolism                     | + 15.0                | - 5.0                               |
| <i>citX</i>                  | Citrate metabolism                     | + 13.4                | - 5.0                               |
| <i>citXG</i>                 | Citrate metabolism                     | + 13.2                | - 2.0                               |
| <u>Serine metabolism</u>     |                                        |                       |                                     |
| <i>sdaA</i>                  | Serine dehydratase                     | + 103.5               |                                     |
| <i>sdaB</i>                  | Serine dehydratase                     | + 94.5                | - 2.5                               |
| <u>Glycerol metabolism</u>   |                                        |                       |                                     |
| <i>glpK</i>                  | Glycerol kinase                        | + 5.7                 | - 2.5                               |
| <i>glpO</i>                  | Glycerol-3-P oxidase                   | + 6.6                 | - 2.5                               |
| <i>gldA2</i>                 | Glycerol dehydrogenase                 | + 13.7                |                                     |
| <u>Molybdenum metabolism</u> |                                        |                       |                                     |
| OG1RF_11183                  | MOSC protein                           | + 30.1                |                                     |
| OG1RF_11185                  | Molybdopterin-binding protein          | + 25.6                |                                     |
| OG1RF_11944                  | Molybdenum hydroxylase                 | + 29.7                |                                     |
| OG1RF_11951                  | Molybdenum hydroxylase                 | + 10.8                | - 2.0                               |
| <i>moaA</i>                  | Molybdenum cofactor synthesis          | + 20.0                |                                     |
| <i>moaB</i>                  | Molybdenum cofactor synthesis          | + 27.1                |                                     |
| <i>moaC</i>                  | Molybdenum cofactor synthesis          | + 10.1                |                                     |
| <i>yedF2</i>                 | Selenium metabolism                    | + 23.3                |                                     |
| <i>ygfJ</i>                  | Molybdenum hydroxylase                 | + 20.6                |                                     |
| <u>Other metabolic genes</u> |                                        |                       |                                     |
| OG1RF_11942                  | Ferredoxin NADP <sup>+</sup> reductase | + 23.4                |                                     |
| OG1RF_11943                  | Flavodoxin                             | + 20.7                |                                     |
| <i>allD</i>                  | Ureidoglycolate dehydrogenase          | + 14.7                |                                     |
| <i>mdh</i>                   | Malate dehydrogenase                   | + 16.5                |                                     |
| <i>fbp</i>                   | Fructose-1,6-bisphosphatase            | + 10.6                | + 3.9                               |
| <i>oadA</i>                  | Oxaloacetate decarboxylase             | + 14.2                | - 3.3                               |
| OG1RF_10107                  | Glycosyl hydrolase                     | + 60.1                |                                     |
| <i>gcdB</i>                  | Glutaconyl-CoA decarboxylase           | + 15.0                | - 5.0                               |
| <i>arcC2</i>                 | Carbamate kinase                       | + 17.4                |                                     |
| <i>gltA</i>                  | Glutamate synthase                     | + 16.8                |                                     |
| OG1RF_11949                  | Cysteine desulfurase                   | + 25.7                | - 2.5                               |
| <i>hydA</i>                  | dihydropyrimidinase                    | + 14.6                |                                     |
| OG1RF_11585                  | Ribosylpyrimidine nucleosidase         | + 11.1                | - 3.3                               |
| OG1RF_10108                  | Endoribonuclease                       | + 48.7                |                                     |
| <i>endOF3</i>                | N-acetylglucosaminidase                | + 60.1                |                                     |

465 (\*) Values represent fold-change in transcription when compared to the parent strain. All values  
466 shown were statistically significant ( $p < 0.05$ ). Blank fields indicate that there were no significant  
467 differences between mutant and parent strains.  
468  
469

470 **FIGURE LEGENDS**

471 **Figure 1. (p)ppGpp and CodY promote virulence of *E. faecalis* in a murine CAUTI model.**

472 The parent strain OG1RF and its derivatives were inoculated into the bladder of mice  
473 immediately after catheter implantation (n = 10). After 72 hours, animals were euthanized and  
474 bacterial burdens in (A) bladders, (B) catheters and (C) kidneys were quantified. Graphs show  
475 total CFU recovered from these sites, each symbol represents an individual mouse, and the  
476 median value is shown as a horizontal line. Symbols on the dashed line indicate that recovery  
477 was below the limit of detection (LOD, 40 CFU). The data was pooled from two independent  
478 experiments. Two-tailed Mann-Whitney *U* tests were performed to determine significance (\**p* <  
479 0.05, \*\**p* < 0.005, \*\*\*\**p* < 0.0001).

480  
481 **Figure 2. (p)ppGpp supports timely growth of *E. faecalis* in human urine.** Growth of the  
482 parent *E. faecalis* OG1RF and its derivative mutant strains in pooled human urine. Aliquots at  
483 selected time points were serially diluted and plated on TSA plates for CFU enumeration. The  
484 graph shows the average log<sub>10</sub>-transformed CFU mean and standard deviations of three  
485 independent experiments. Mutant strains were compared to wild-type OG1RF by a two-way  
486 ANOVA with Dunnett's multiple comparison test Asterisks indicate significant differences at 3  
487 hours of incubation for  $\Delta rel$ , (p)ppGpp<sup>0</sup> and (p)ppGpp<sup>0</sup> $\Delta codY$  and at 7 hours of incubation for  
488  $\Delta rel$  and (p)ppGpp<sup>0</sup> $\Delta codY$  (*p* < 0.0001).

489  
490 **Figure 3. The (p)ppGpp/CodY network contributes to biofilm formation in urine. (A)**

491 Fibrinogen-coated 96-well polystyrene plates were incubated with *E. faecalis* strains for 48  
492 hours in human urine supplemented with 20 mg ml<sup>-1</sup> BSA. Plates were stained with 0.5% crystal  
493 violet, which was subsequently dissolved with 33% acetic acid and absorbance at 595 nm was  
494 measured. (B) EbpA quantification in urine. Strains were grown in urine + BSA overnight prior to  
495 quantification of EbpA by ELISA. EbpA surface exposure on *E. faecalis* cells was detected using  
496 mouse anti-EbpA<sup>Full</sup> and HRP-conjugated goat anti-rabbit antisera, and absorbance was

497 determined at 450 nm. EbpA production titers were normalized against the bacterial titers.  
498 Experiments were performed independently in triplicate and analyzed by a two-tailed Mann-  
499 Whitney *U* test (\* $p < 0.05$ , \*\*\*\* $p < 0.0001$ ).

500  
501 **Figure 4. The transcript levels of *ebpA*, *efa*, *mntH2* and c-di-AMP synthase (*cdaA*) and**  
502 **hydrolases (*pde* and *gdpP*) genes in BHI and urine.**The *E. faecalis* OG1RF wild type,  
503 (p)ppGpp<sup>0</sup>, (p)ppGpp<sup>0</sup> $\Delta$ *codY* and  $\Delta$ *codY* strains were grown in BHI to mid-exponential growth  
504 phase. Cell pellets were washed thoroughly and then exposed to pooled human urine and fresh  
505 BHI for 30 min. The transcript levels of (A) *ebpA*, (B) *efaC* (C) *mntH2* (D) *cdaA*, (E) *pde* and (F)  
506 *gdpP* were determined by quantitative real time-PCR (qRT-PCR). The bar graphs show average  
507 and standard deviations of results from three independent experiments performed in triplicate.  
508 Differences seen with the same strains under different conditions(#) or between parent and  
509 mutant strains under same growth condition (\*) were compared via Student's *t* test or ANOVA  
510 with multiple comparison test respectively, ( $p < 0.05$ )

511

## 512 **Supporting information**

513 **Table S1.** List of genes differentially expressed in the (p)ppGpp<sup>0</sup> strain in comparison to the  
514 parent OG1RF strain ( $p \leq 0.05$ , 2-fold cutoff).

515 **Table S2.** List of genes differentially expressed in the triple mutant  $\Delta$ *codY*(p)ppGpp<sup>0</sup> strain in  
516 comparison to the parent OG1RF strain ( $p \leq 0.05$ , 2-fold cutoff).

517 **Table S3.** Side by side comparison of linear fold-change of selected genes in the (p)ppGpp<sup>0</sup>  
518 strain and triple mutant  $\Delta$ *codY*(p)ppGpp<sup>0</sup> strain in comparison to the parent OG1RF strain.

519 **Table S4.** Primers used for qPCR.

520

521 **REFERENCES**

- 522 1. Reed D, Kemmerly SA. 2009. Infection control and prevention: a review of hospital-  
523 acquired infections and the economic implications. *Ochsner J* 9:27-31.
- 524 2. Foxman B. 2010. The epidemiology of urinary tract infection. *Nat Rev Urol* 7:653-60.
- 525 3. Lobdell KW, Stamou S, Sanchez JA. 2012. Hospital-acquired infections. *Surg Clin North*  
526 *Am* 92:65-77.
- 527 4. Flores-Mireles AL, Walker JN, Caparon M, Hultgren SJ. 2015. Urinary tract infections:  
528 epidemiology, mechanisms of infection and treatment options. *Nat Rev Microbiol* 13:269-  
529 84.
- 530 5. Lleo M, Bonato B, Tafi MC, Caburlotto G, Benedetti D, Canepari P. 2007. Adhesion to  
531 medical device materials and biofilm formation capability of some species of enterococci  
532 in different physiological states. *FEMS Microbiol Lett* 274:232-7.
- 533 6. Niveditha S, Pramodhini S, Umadevi S, Kumar S, Stephen S. 2012. The Isolation and  
534 the Biofilm Formation of Uropathogens in the Patients with Catheter Associated Urinary  
535 Tract Infections (UTIs). *J Clin Diagn Res* 6:1478-82.
- 536 7. Arias CA, Murray BE. 2012. The rise of the *Enterococcus*: beyond vancomycin  
537 resistance. *Nat Rev Microbiol* 10:266-78.
- 538 8. Potrykus K, Cashel M. 2008. (p)ppGpp: still magical? *Annu Rev Microbiol* 62:35-51.
- 539 9. Dalebroux ZD, Svensson SL, Gaynor EC, Swanson MS. 2010. ppGpp conjures bacterial  
540 virulence. *Microbiol Mol Biol Rev* 74:171-99.
- 541 10. Abranches J, Martinez AR, Kajfasz JK, Chavez V, Garsin DA, Lemos JA. 2009. The  
542 molecular alarmone (p)ppGpp mediates stress responses, vancomycin tolerance, and  
543 virulence in *Enterococcus faecalis*. *J Bacteriol* 191:2248-56.
- 544 11. Yan X, Zhao C, Budin-Verneuil A, Hartke A, Rince A, Gilmore MS, Auffray Y, Pichereau  
545 V. 2009. The (p)ppGpp synthetase RelA contributes to stress adaptation and virulence in  
546 *Enterococcus faecalis* V583. *Microbiology* 155:3226-37.

- 547 12. Chavez de Paz LE, Lemos JA, Wickstrom C, Sedgley CM. 2012. Role of (p)ppGpp in  
548 biofilm formation by *Enterococcus faecalis*. *Appl Environ Microbiol* 78:1627-30.
- 549 13. Gaca AO, Abranches J, Kajfasz JK, Lemos JA. 2012. Global transcriptional analysis of  
550 the stringent response in *Enterococcus faecalis*. *Microbiology* 158:1994-2004.
- 551 14. Gaca AO, Kajfasz JK, Miller JH, Liu K, Wang JD, Abranches J, Lemos JA. 2013. Basal  
552 levels of (p)ppGpp in *Enterococcus faecalis*: the magic beyond the stringent response.  
553 *MBio* 4:e00646-13.
- 554 15. Frank KL, Colomer-Winter C, Grindle SM, Lemos JA, Schlievert PM, Dunny GM. 2014.  
555 Transcriptome analysis of *Enterococcus faecalis* during mammalian infection shows  
556 cells undergo adaptation and exist in a stringent response state. *PLoS One* 9:e115839.
- 557 16. Colomer-Winter C, Gaca AO, Lemos JA. 2017. Association of Metal Homeostasis and  
558 (p)ppGpp Regulation in the Pathophysiology of *Enterococcus faecalis*. *Infect Immun*  
559 85(7):e00260-17.
- 560 17. Colomer-Winter C, Gaca AO, Chuang-Smith ON, Lemos JA, Frank KL. 2018. Basal  
561 levels of (p)ppGpp differentially affect the pathogenesis of infective endocarditis in  
562 *Enterococcus faecalis*. *Microbiology* 164:1254-1265.
- 563 18. Gaca AO, Colomer-Winter C, Lemos JA. 2015. Many means to a common end: the  
564 intricacies of (p)ppGpp metabolism and its control of bacterial homeostasis. *J Bacteriol*  
565 197:1146-56.
- 566 19. Gaca AO, Kudrin P, Colomer-Winter C, Beljantseva J, Liu K, Anderson B, Wang JD,  
567 Rejman D, Potrykus K, Cashel M, Hauryliuk V, Lemos JA. 2015. From (p)ppGpp to  
568 (pp)pGpp: Characterization of Regulatory Effects of pGpp Synthesized by the Small  
569 Alarmone Synthetase of *Enterococcus faecalis*. *J Bacteriol* 197:2908-19.
- 570 20. Geiger T, Wolz C. 2014. Intersection of the stringent response and the CodY regulon in  
571 low GC Gram-positive bacteria. *Int J Med Microbiol* 304:150-5.



- 572 21. Guiton PS, Hung CS, Hancock LE, Caparon MG, Hultgren SJ. 2010. Enterococcal  
573 biofilm formation and virulence in an optimized murine model of foreign body-associated  
574 urinary tract infections. *Infect Immun* 78:4166-75.
- 575 22. Flores-Mireles AL, Pinkner JS, Caparon MG, Hultgren SJ. 2014. EbpA vaccine  
576 antibodies block binding of *Enterococcus faecalis* to fibrinogen to prevent catheter-  
577 associated bladder infection in mice. *Sci Transl Med* 6:254ra127.
- 578 23. Flores-Mireles AL, Walker JN, Potretzke A, Schreiber HLt, Pinkner JS, Bauman TM,  
579 Park AM, Desai A, Hultgren SJ, Caparon MG. 2016. Antibody-Based Therapy for  
580 Enterococcal Catheter-Associated Urinary Tract Infections. *MBio* 7(5):e01653-16.
- 581 24. Xu W, Flores-Mireles AL, Cusumano ZT, Takagi E, Hultgren SJ, Caparon MG. 2017.  
582 Host and bacterial proteases influence biofilm formation and virulence in a murine model  
583 of enterococcal catheter-associated urinary tract infection. *NPJ Biofilms Microbiomes*  
584 3:28.
- 585 25. Flores-Mireles AL, Walker JN, Bauman TM, Potretzke AM, Schreiber HLt, Park AM,  
586 Pinkner JS, Caparon MG, Hultgren SJ, Desai A. 2016. Fibrinogen Release and  
587 Deposition on Urinary Catheters Placed during Urological Procedures. *J Urol* 196:416-  
588 421.
- 589 26. Nallapareddy SR, Singh KV, Sillanpaa J, Zhao M, Murray BE. 2011. Relative  
590 contributions of Ebp Pili and the collagen adhesin *ace* to host extracellular matrix protein  
591 adherence and experimental urinary tract infection by *Enterococcus faecalis* OG1RF.  
592 *Infect Immun* 79:2901-10.
- 593 27. Nielsen HV, Guiton PS, Kline KA, Port GC, Pinkner JS, Neiers F, Normark S, Henriques-  
594 Normark B, Caparon MG, Hultgren SJ. 2012. The metal ion-dependent adhesion site  
595 motif of the *Enterococcus faecalis* EbpA pilin mediates pilus function in catheter-  
596 associated urinary tract infection. *MBio* 3:e00177-12.

- 597 28. Terleckyj B, Willett NP, Shockman GD. 1975. Growth of several cariogenic strains of oral  
598 streptococci in a chemically defined medium. *Infect Immun* 11:649-55.
- 599 29. Colomer-Winter C, Flores-Mireles AL, Baker SP, Frank KL, Lynch AJL, Hultgren SJ,  
600 Kitten T, Lemos JA. 2018. Manganese acquisition is essential for virulence of  
601 *Enterococcus faecalis*. *PLoS Pathog* 14:e1007102.
- 602 30. Whiteley AT, Pollock AJ, Portnoy DA. 2015. The PAMP c-di-AMP Is Essential for *Listeria*  
603 *monocytogenes* Growth in Rich but Not Minimal Media due to a Toxic Increase in  
604 (p)ppGpp. [corrected]. *Cell Host Microbe* 17:788-98.
- 605 31. Whiteley AT, Garelis NE, Peterson BN, Choi PH, Tong L, Woodward JJ, Portnoy DA.  
606 2017. c-di-AMP modulates *Listeria monocytogenes* central metabolism to regulate  
607 growth, antibiotic resistance and osmoregulation. *Mol Microbiol* 104:212-233.
- 608 32. Pham HT, Nhiep NTH, Vu TNM, Huynh TN, Zhu Y, Huynh ALD, Chakraborti A,  
609 Marcellin E, Lo R, Howard CB, Bansal N, Woodward JJ, Liang ZX, Turner MS. 2018.  
610 Enhanced uptake of potassium or glycine betaine or export of cyclic-di-AMP restores  
611 osmoresistance in a high cyclic-di-AMP *Lactococcus lactis* mutant. *PLoS Genet*  
612 14:e1007574.
- 613 33. Townsley L, Yannarell SM, Huynh TN, Woodward JJ, Shank EA. 2018. Cyclic di-AMP  
614 Acts as an Extracellular Signal That Impacts *Bacillus subtilis* Biofilm Formation and Plant  
615 Attachment. *MBio* 9.
- 616 34. Teh WK, Dramsi S, Tolker-Nielsen T, Yang L, Givskov M. 2019. Increased Intracellular  
617 Cyclic di-AMP Levels Sensitize *Streptococcus gallolyticus* subsp. *gallolyticus* to Osmotic  
618 Stress and Reduce Biofilm Formation and Adherence on Intestinal Cells. *J Bacteriol* 201.
- 619 35. Commichau FM, Heidemann JL, Ficner R, Stulke J. 2019. Making and Breaking of an  
620 Essential Poison: the Cyclases and Phosphodiesterases That Produce and Degrade the  
621 Essential Second Messenger Cyclic di-AMP in Bacteria. *J Bacteriol* 201.

- 622 36. Bennett HJ, Pearce DM, Glenn S, Taylor CM, Kuhn M, Sonenshein AL, Andrew PW,  
623 Roberts IS. 2007. Characterization of *relA* and *codY* mutants of *Listeria monocytogenes*:  
624 identification of the CodY regulon and its role in virulence. *Mol Microbiol* 63:1453-67.
- 625 37. Geiger T, Goerke C, Fritz M, Schafer T, Ohlsen K, Liebeke M, Lalk M, Wolz C. 2010.  
626 Role of the (p)ppGpp synthase RSH, a RelA/SpoT homolog, in stringent response and  
627 virulence of *Staphylococcus aureus*. *Infect Immun* 78:1873-83.
- 628 38. Vebo HC, Solheim M, Snipen L, Nes IF, Brede DA. 2010. Comparative genomic analysis  
629 of pathogenic and probiotic *Enterococcus faecalis* isolates, and their transcriptional  
630 responses to growth in human urine. *PLoS One* 5:e12489.
- 631 39. Kirchmann H, Pettersson S. 1994. Human urine - Chemical composition and fertilizer  
632 use efficiency. *Fertilizer research* 40:149-154.
- 633 40. Shaykhutdinov RA, MacInnis GD, Dowlatabadi R, Weljie AM, Vogel HJ. 2009.  
634 Quantitative analysis of metabolite concentrations in human urine samples using  
635  $^{13}\text{C}\{^1\text{H}\}$  NMR spectroscopy. *Metabolomics* 5:307-317.
- 636 41. Bouatra S, Aziat F, Mandal R, Guo AC, Wilson MR, Knox C, Bjorndahl TC,  
637 Krishnamurthy R, Saleem F, Liu P, Dame ZT, Poelzer J, Huynh J, Yallou FS,  
638 Psychogios N, Dong E, Bogumil R, Roehring C, Wishart DS. 2013. The Human Urine  
639 Metabolome. *PLoS ONE* 8:e73076.
- 640 42. Corrigan RM, Bowman L, Willis AR, Kaefer V, Grundling A. 2015. Cross-talk between  
641 two nucleotide-signaling pathways in *Staphylococcus aureus*. *J Biol Chem* 290:5826-39.
- 642 43. Dengler V, McCallum N, Kiefer P, Christen P, Patrignani A, Vorholt JA, Berger-Bachi B,  
643 Senn MM. 2013. Mutation in the C-di-AMP cyclase *dacA* affects fitness and resistance of  
644 methicillin resistant *Staphylococcus aureus*. *PLoS One* 8:e73512.
- 645 44. Smith WM, Pham TH, Lei L, Dou J, Soomro AH, Beatson SA, Dykes GA, Turner MS.  
646 2012. Heat resistance and salt hypersensitivity in *Lactococcus lactis* due to spontaneous

- 647 mutation of *llmg\_1816* (*gdpP*) induced by high-temperature growth. *Appl Environ*  
648 *Microbiol* 78:7753-9.
- 649 45. Huynh TN, Choi PH, Sureka K, Ledvina HE, Campillo J, Tong L, Woodward JJ. 2016.  
650 Cyclic di-AMP targets the cystathionine beta-synthase domain of the osmolyte  
651 transporter OpuC. *Mol Microbiol* 102:233-243.
- 652 46. Banerjee R, Gretes M, Harlem C, Basuino L, Chambers HF. 2010. A *mecA*-negative  
653 strain of methicillin-resistant *Staphylococcus aureus* with high-level beta-lactam  
654 resistance contains mutations in three genes. *Antimicrob Agents Chemother* 54:4900-2.
- 655 47. Pugh SY, Knowles CJ. 1982. Growth of *Streptococcus faecalis* var. *zymogenes* on  
656 glycerol: the effect of aerobic and anaerobic growth in the presence and absence of  
657 haematin on enzyme synthesis. *J Gen Microbiol* 128:1009-17.
- 658 48. Johnson JL, Hainline BE, Rajagopalan KV. 1980. Characterization of the molybdenum  
659 cofactor of sulfite oxidase, xanthine, oxidase, and nitrate reductase. Identification of a  
660 pteridine as a structural component. *J Biol Chem* 255:1783-6.
- 661 49. Schwarz G, Mendel RR, Ribbe MW. 2009. Molybdenum cofactors, enzymes and  
662 pathways. *Nature* 460:839-47.
- 663 50. Leimkuhler S, Wuebbens MM, Rajagopalan KV. 2011. The History of the Discovery of  
664 the Molybdenum Cofactor and Novel Aspects of its Biosynthesis in Bacteria. *Coord*  
665 *Chem Rev* 255:1129-1144.
- 666 51. Johnson JL, Rajagopalan KV. 1982. Structural and metabolic relationship between the  
667 molybdenum cofactor and urothione. *Proc Natl Acad Sci U S A* 79:6856-60.
- 668 52. Colomer-Winter C, Lemos JA, Flores-Mireles AL. 2019. Biofilm Assays on Fibrinogen-  
669 coated Silicone Catheters and 96-well Polystyrene Plates. *Bio-protocol* 9:e3196.
- 670 53. Abranches J, Candella MM, Wen ZT, Baker HV, Burne RA. 2006. Different roles of  
671 EIIABMan and EIIGlc in regulation of energy metabolism, biofilm development, and  
672 competence in *Streptococcus mutans*. *J Bacteriol* 188:3748-56.

- 673 54. Kajfasz JK, Ganguly T, Hardin EL, Abranches J, Lemos JA. 2017. Transcriptome  
674 responses of *Streptococcus mutans* to peroxide stress: identification of novel antioxidant  
675 pathways regulated by Spx. Sci Rep 7:16018.  
676

FIG 1

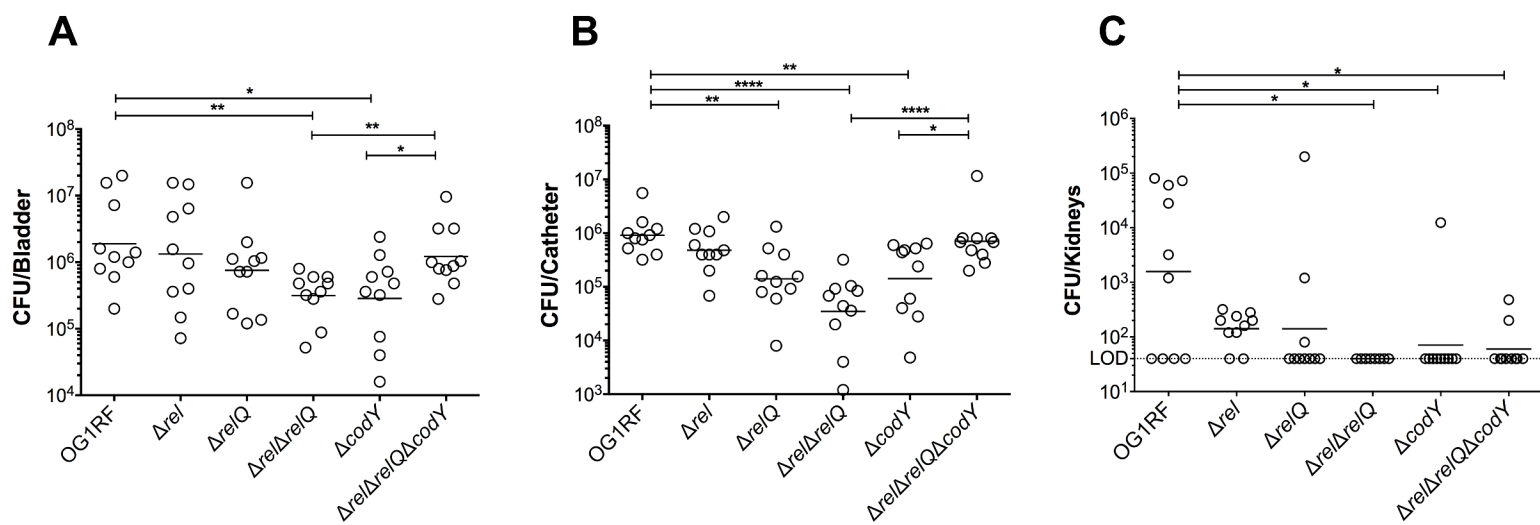

FIG 2

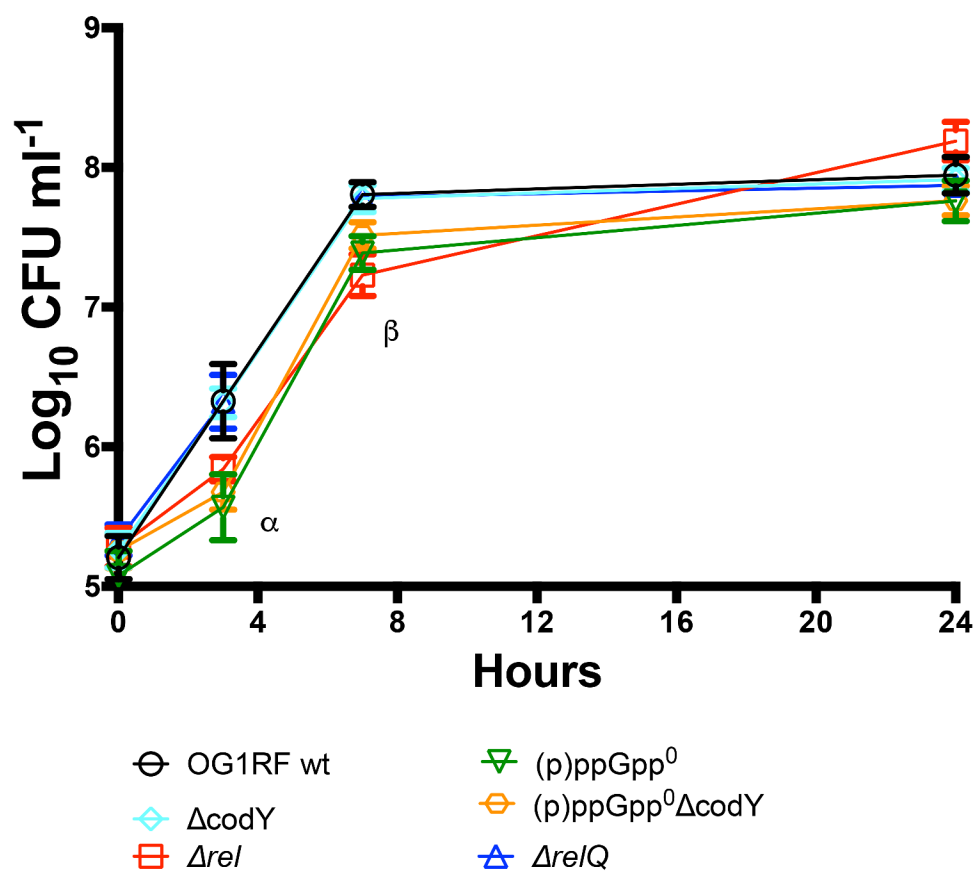

FIG 3

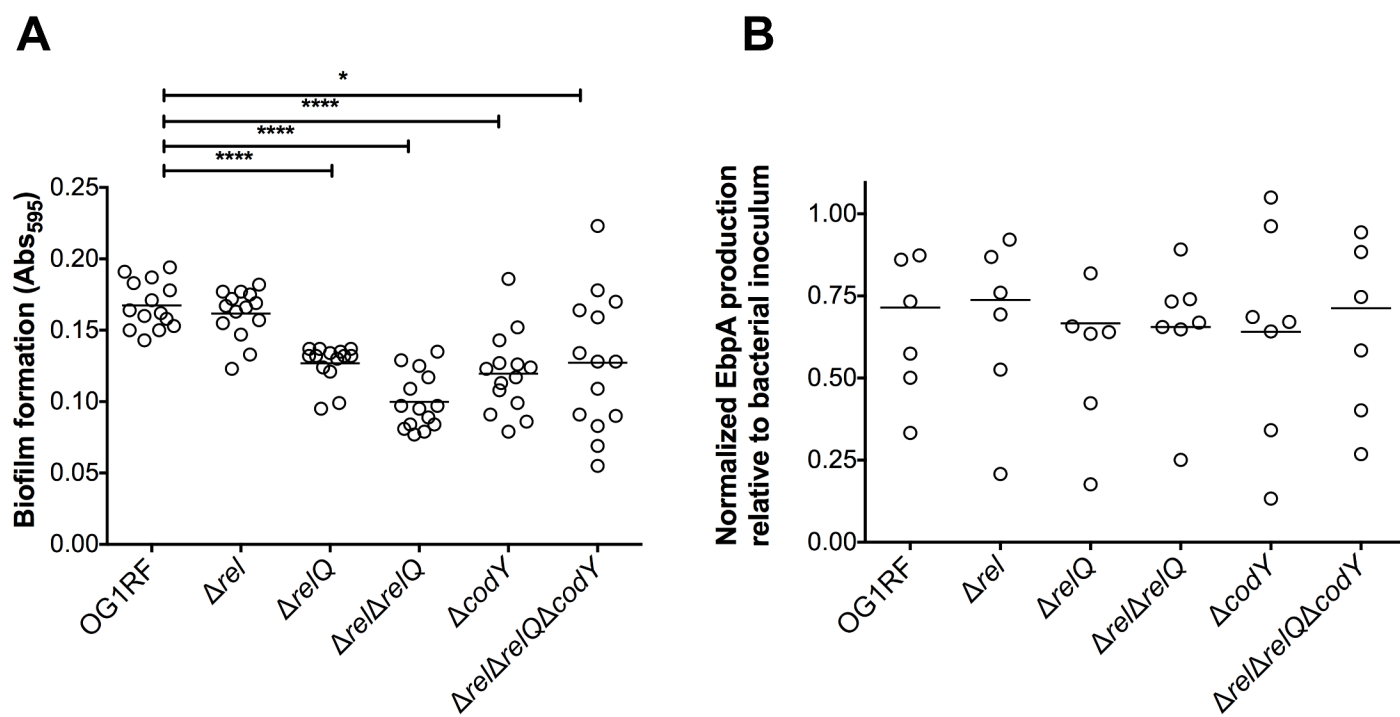



FIG 4

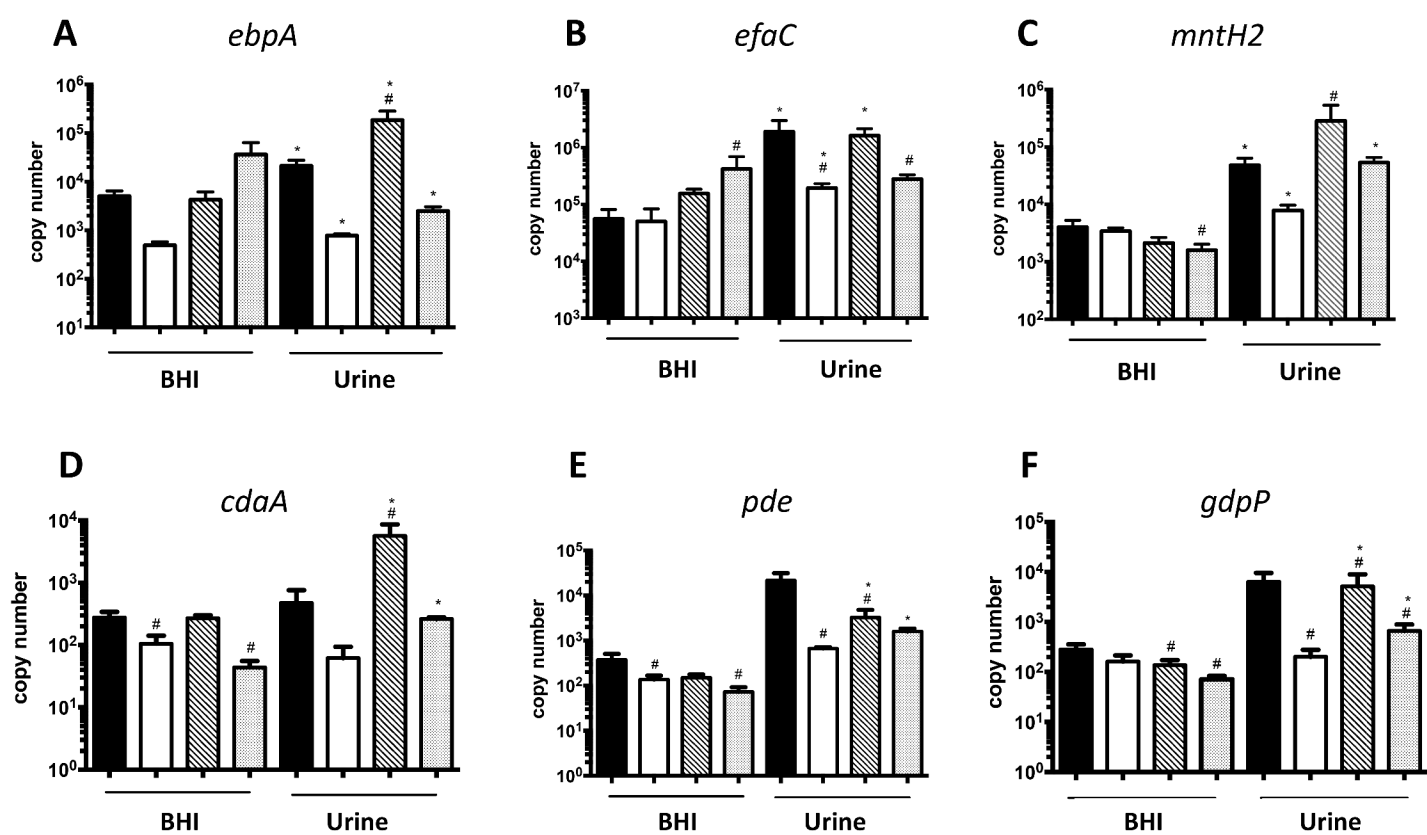

Source: https://www.biorxiv.org/content/10.1101/655118v1.full.pdf
